# Supplementary material
Source: MDPI journal article supplement (https://www.mdpi.com/2073-4344/13/4/654)
Supplement: s1 [file s1]

# Secondary amines from catalytic amination of bio-derived phenolics over Pd/C and Rh/C: Effect of operation parameters.

Maray Ortega<sup>1</sup>, Raydel Manrique<sup>2</sup>, Romel Jiménez<sup>2</sup>, Miriam Parreño<sup>3</sup>, Marcelo E. Domine<sup>3</sup> and Luis E. Arteaga-Pérez<sup>2,\*</sup>

1 Laboratory of Thermal and Catalytic Processes (LPTC), Wood Engineering Department, Faculty of Engineering, Universidad del Bio-Bio, Concepción, Chile.

2 Carbon and Catalysis Laboratory (CarboCat), Department of Chemical Engineering, Faculty of Engineering, University of Concepcion, Chile.

3 Instituto de Tecnología Química (UPV-CSIC), Universitat Politècnica de València, Consejo Superior de Investigaciones Científicas, Avda. de los Naranjos s/n, 46022 Valencia, Spain.

\* Correspondence: [larteaga@ubiobio.cl](mailto:larteaga@ubiobio.cl)

**Table S1.** Binding energy (BE, eV), kinetic energy (KE, eV) and modified Auger parameter ( $\alpha'$ =BE+KE, eV) values of Pd 3d<sub>5/2</sub> and Rh 3d<sub>5/2</sub> on catalysts before reduction the H<sub>2</sub> and after reduction conditions (400°C and H<sub>2</sub>)

| Catalysts | Condition | Chemical state   | Pd 3d <sub>5/2</sub> |         |                |           |
|-----------|-----------|------------------|----------------------|---------|----------------|-----------|
|           |           |                  | BE (eV)              | KE (eV) | $\alpha'$ (eV) | Pd, at. % |
| Pd/C      | Before    | Pd <sup>0</sup>  | 335.1                | 327.5   | 662.6          | 46.38     |
|           | Reduction | Pd <sup>2+</sup> | 335.9                | 322.6   | 658.5          | 52.61     |
|           | After     | Pd <sup>0</sup>  | 336.2                | 327.2   | 663.1          | 61.46     |
|           | reduction | Pd <sup>2+</sup> | 335.3                | 321.9   | 667.2          | 38.54     |
|           | Condition | Chemical state   | Rh 3d <sub>5/2</sub> |         |                |           |
|           |           |                  | BE (eV)              | KE (eV) | $\alpha'$ (eV) | Rh, at. % |
| Rh/C      | Before    | Rh <sup>0</sup>  | 314.0                | 294.6   | 608.6          | 40.21     |
|           | Reduction | Rh <sup>2+</sup> | 312.1                | 295.4   | 607.5          | 59.79     |
|           | After     | Rh <sup>0</sup>  | 308.8                | 299.6   | 608.4          | 60.45     |
|           | reduction | Rh <sup>2+</sup> | 307.4                | 299.9   | 607.3          | 39.55     |

**Table S2.** Amination the phenol of different amines catalyst Pd/C and Rh/C in presence of H<sub>2</sub> (1.5 bar). Reactions were carried in 10 mL glass autoclaves, 0.2 mol/L of phenol, using tert- amyl alcohol as a solvent.

| Catalyst | Amine                                                                             | Conditions reactions    | Conversion (%) | Yield (%) |
|----------|-----------------------------------------------------------------------------------|-------------------------|----------------|-----------|
| Pd/C     | 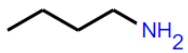 | 120°C, 1.4 eq amine, 6h | 24.5           | 36        |
|          |                                                                                   | 160°C, 1.4 eq amine, 8h | 31             | 42        |
|          |                                                                                   | 160°C, 2 eq amine, 6h   | 27.3           | 25        |
|          |  | 120°C, 1.4 eq amine, 6h | 0              | -         |
|          |                                                                                   | 160°C, 1.4 eq amine, 8h | 1              | -         |
|          |                                                                                   | 160°C, 2 eq amine, 6h   | 1              | -         |
| Rh/C     |  | 120°C, 1.4 eq amine, 6h | 15.4           | 19        |
|          |                                                                                   | 160°C, 1.4 eq amine, 8h | 22.6           | 18        |
|          |                                                                                   | 160°C, 2 eq amine, 6h   | 17.1           | 11        |
|          |  | 160°C, 1.4 eq amine, 6h | 0              | -         |
|          |                                                                                   | 160°C, 1.4 eq amine, 8h | 0.1            | -         |
|          |                                                                                   | 160°C, 2 eq amine, 6h   | 0              | -         |

$$X_i = 100 \times \left( (n_{i,o} - n_{i,t}) / n_{i,o} \right), i = \text{reactants}, t = \text{reaction time}.$$

$$S_i = 100 \times \left( n_{i,t} / \sum_{i=1}^n n_{i,t} \right), i = \text{reactants}, n = \text{products}, t = \text{reaction time}.$$

\*Quantities results were determined by GC-FID analysis (Agilent Technologies 7890A), and an HP-5 MS capillary column (30 m x 250 µm x 0.25 µm), nonone as internal standard.

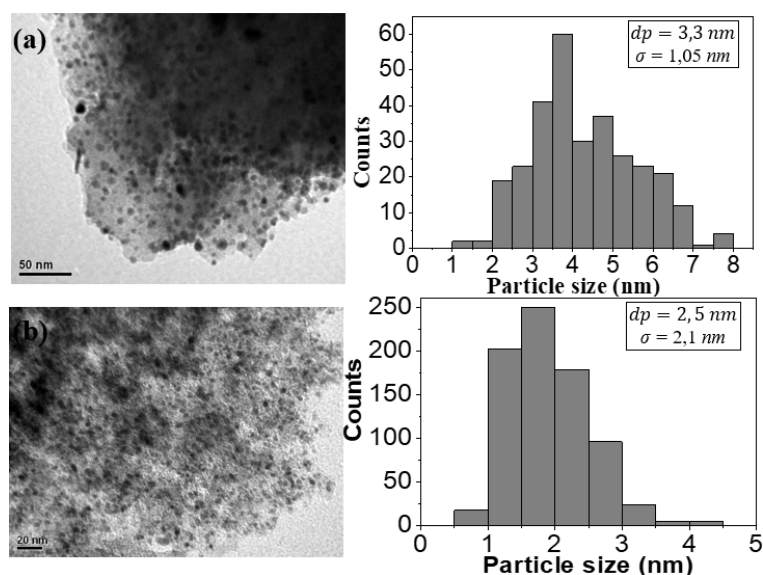

**Figure S1.** Transmission electron microscopy images and mean particle size ( $dp$ ) of a) Pd/C, (b) Rh/C after reduction..

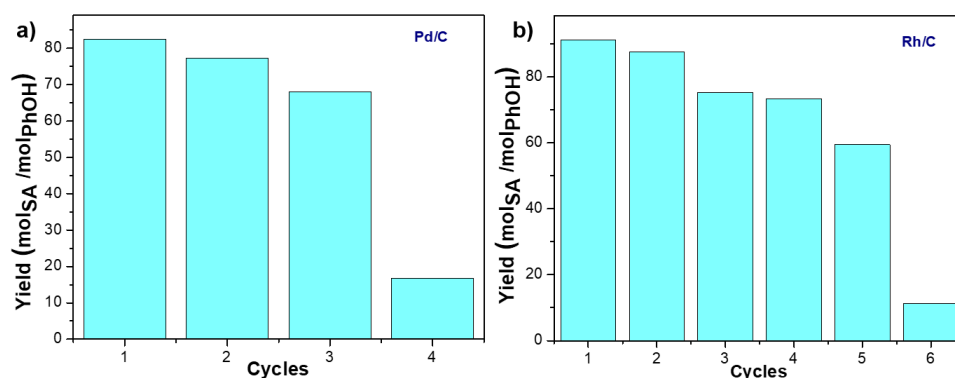

**Figure S2.** Stability catalytic assays a) Pd/C and b) Rh/C.  $T = 120\text{ }^{\circ}\text{C}$ ,  $P_{\text{H}_2} = 1.5\text{ bar}$ ,  $C^0_{\text{PhOH}} = 0.2\text{ mol/L}$ ,  $C^0_{\text{Amine}} = 1.4\text{ Eqv.}$ ,  $t = 6\text{ h}$ ,  $V_R = 4\text{ mL}$ .

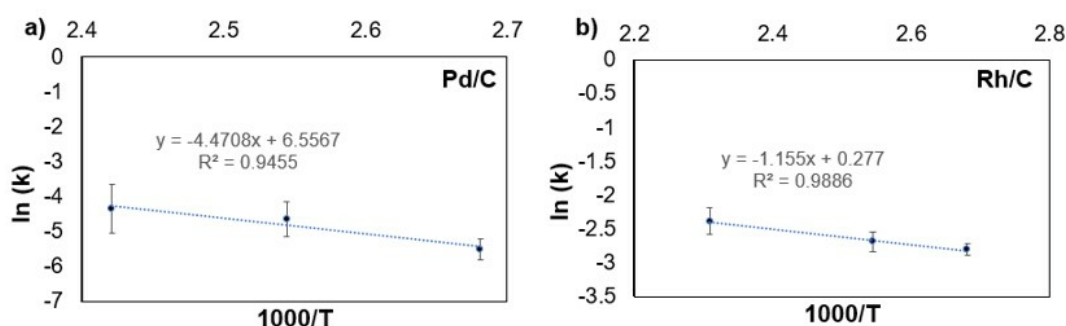

**Figure S3.** Arrhenius plots for reductive phenol amination with cyclohexylamine (a) reaction performed on Pd/C, (b) reaction performed on Rh/C.

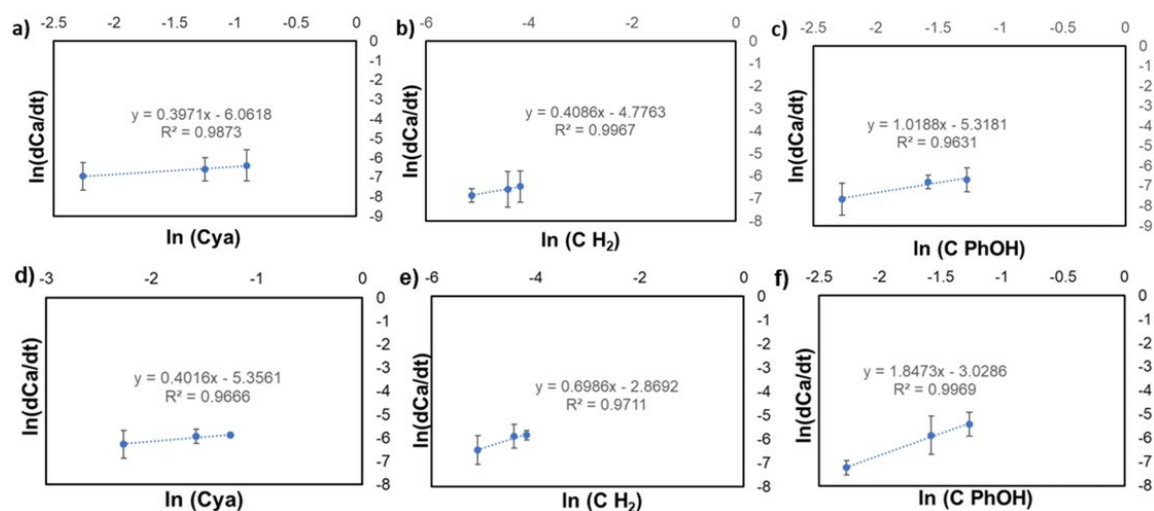

**Figure S4.** Fitting plots of power law kinetic model data fit to determine reaction orders of (a), (d) cyclohexylamine (CyA); (b), (e), Hydrogen ( $\text{H}_2$ ) and (c), (f) phenol (PhOH) of Pd/C and Rh/C, respectively.
